# Supplementary material for: Ablative Radiotherapy as a Strategy to Overcome TKI Resistance in EGFR-Mutated NSCLC
Source: MDPI journal article supplement (doi:10.3390/cancers14163983), 2022-08-18
Supplement: s1 [file s1]

**Literature Search**  
**Ablative Radiotherapy as a Strategy to Overcome TKI Resistance in EGFR-mutation NSCLC**

Literature Search Performed on: April 11, 2022

Beginning Date: January 2010

End Date: March 2022

Database: Ovid MEDLINE(R) without Revisions <2010 to June Week 1 2021>

Search Strategy:

-----  
key words:

Lung neoplasms

Lung cancer

Lung carcinoma

Non-small cell lung cancer

NSCLC

Metastatic

Stage IV or Stage 4

Oligometastasis

Oligometastases

Oligometastatic

Oligopersistent

Oligoprogression

Oligoprogressive

Oligorecurrent

Polymetastatic

External beam radiation therapy or external beam radiotherapy

Stereotactic body radiation therapy or stereotactic body radiotherapy

SBRT

Stereotactic ablative radiation therapy or stereotactic ablative radiotherapy

SABR

Stereotactic radiosurgery

SRS

Radiotherapy

Chemotherapy

Targeted therapy

Epidermal growth factor receptor

EGFR

EGFR-mutant

Resistant

Refractory

Randomized

Randomised

Prospective

Criteria:

All adults (18 plus years)

Abstracts, review papers, and meta-analyses included  
English language  
2010 – current  
Exclude case reports
